# Supplementary material
Source: PubMed Central journal article supplement (PMC3709994)
Supplement: jn.112.173807_nutrition173807SupplementaryData1.pdf [file jn.112.173807_nutrition173807SupplementaryData1.pdf]

ONLINE SUPPORTING MATERIAL

Supplemental Table 1. Frequency of regular coffee, decaffeinated coffee, and tea consumption in NOMAS (N=2461)<sup>1</sup>

| Consumption category | Regular coffee | Decaffeinated coffee | Tea |
|----------------------|----------------|----------------------|-----|
| <1/month             | 698            | 1457                 | 883 |
| 1-3/month            | 90             | 81                   | 291 |
| 1/week               | 61             | 48                   | 158 |
| 2-4/week             | 148            | 86                   | 380 |
| 5-6/week             | 116            | 51                   | 105 |
| 1/day                | 728            | 190                  | 394 |
| 2-3/day              | 473            | 90                   | 155 |
| 4-5/day              | 62             | 14                   | 24  |
| ≥6/day               | 25             | 9                    | 13  |
| Missing              | 60             | 435                  | 58  |

<sup>1</sup> Values are N participants in each category

Supplemental Table 2. Relationship between decaffeinated coffee consumption and mortality (N=2461)

| Decaffeinated coffee consumption | All death         | Hazard Ratio (95% Confidence Interval) |                   |                   |
|----------------------------------|-------------------|----------------------------------------|-------------------|-------------------|
|                                  |                   | Vascular death                         | Nonvascular death | Cancer death      |
| Model 3 <sup>1</sup>             |                   |                                        |                   |                   |
| <1/month                         | 1.00 (ref)        | 1.00 (ref)                             | 1.00 (ref)        | 1.00 (ref)        |
| 1/month-4/week                   | 0.86 (0.67, 1.09) | 0.79 (0.54, 1.15)                      | 0.89 (0.64, 1.24) | 1.30 (0.79, 2.13) |
| 5-7/week                         | 0.69 (0.54, 0.87) | 0.70 (0.49, 1.00)                      | 0.58 (0.41, 0.82) | 0.57 (0.31, 1.05) |
| ≥2/day                           | 0.74 (0.53, 1.01) | 0.81 (0.51, 1.29)                      | 0.64 (0.40, 1.05) | 0.85 (0.41, 1.77) |
| Continuous, cups/day             | 0.88 (0.79, 0.98) | 0.92 (0.79, 1.07)                      | 0.81 (0.68, 0.96) | 0.84 (0.64, 1.09) |
| Model 4 <sup>2</sup>             |                   |                                        |                   |                   |
| <1/month                         | 1.00 (ref)        | 1.00 (ref)                             | 1.00 (ref)        | 1.00 (ref)        |
| 1/month-4/week                   | 0.84 (0.65, 1.08) | 0.72 (0.48, 1.08)                      | 0.95 (0.67, 1.34) | 1.21 (0.71, 2.05) |
| 5-7/week                         | 0.70 (0.54, 0.89) | 0.71 (0.49, 1.03)                      | 0.58 (0.40, 0.85) | 0.48 (0.23, 1.00) |
| ≥2/day                           | 0.69 (0.49, 0.99) | 0.80 (0.49, 1.32)                      | 0.61 (0.36, 1.04) | 0.73 (0.31, 1.74) |
| Continuous, cups/day             | 0.87 (0.77, 0.98) | 0.92 (0.78, 1.08)                      | 0.80 (0.67, 0.96) | 0.78 (0.57, 1.09) |

<sup>1</sup>Model 3: Adjusted for demographics (age, sex, race/ethnicity, education), behavioral risk factors (smoking, moderate alcohol use, moderate-heavy physical activity), diet (total daily energy, protein, carbohydrates, total fat, saturated fat), BMI, vascular risk factors (history of cardiac disease, diabetes, hypertension, hypercholesterolemia), and tea consumption

<sup>2</sup>Model 4: Adjusted for demographics (age, sex, race/ethnicity, education), behavioral risk factors (pack-years of smoking, alcohol consumed/day, moderate-heavy physical activity), diet (total daily energy, protein, carbohydrates, total fat, saturated fat), BMI, vascular risk factors (history of cardiac disease, diabetes, hypertension, hypercholesterolemia), other non-water beverage consumption, milk in coffee/tea, cream in coffee/tea, nondairy creamer in coffee/tea, and tea consumption

Online Supporting Material

Supplemental Table 3. Minimum effect size (hazard ratio for per cup/day increase) for 80% power, given the cumulative event rates, distributions of coffee and tea consumptions, sample size of 2461, at a two-sided alpha=0.05<sup>1</sup>

| Beverage (SD)               | All death (35.1%) | Event (cumulative rate) |                           |               |
|-----------------------------|-------------------|-------------------------|---------------------------|---------------|
|                             |                   | Vascular death (13.9%)  | Nonvascular death (18.0%) | Cancer (6.5%) |
| All coffee (1.35)           | <b>0.93</b>       | 0.89                    | 0.91                      | 0.85          |
| Regular coffee (1.20)       | 0.92              | 0.88                    | 0.90                      | 0.83          |
| Decaffeinated coffee (0.79) | 0.89              | 0.83                    | 0.85                      | 0.76          |
| Tea (0.88)                  | <b>0.90</b>       | 0.84                    | <b>0.86</b>               | <b>0.78</b>   |

<sup>1</sup> Values are the minimum effect size (hazard ratio for per cup/day increase) for 80% power

Online Supporting Material

Supplemental Table 4. Minimum effect size (hazards ratio) for 80% power, given the overall event rates, distributions of coffee and tea consumptions, sample sizes, and at alpha=0.05 for two-sided test (N=2461)<sup>1</sup>

| Beverage consumption | N   | Event (overall rate) |                        |                           |               |
|----------------------|-----|----------------------|------------------------|---------------------------|---------------|
|                      |     | All death (35.1%)    | Vascular death (13.9%) | Nonvascular death (18.0%) | Cancer (6.5%) |
| All coffee           |     |                      |                        |                           |               |
| <1/month             | 420 | Ref.                 | Ref.                   | Ref.                      | Ref.          |
| 1/month-4/week       | 349 | 0.71                 | 0.58                   | 0.62                      | 0.45          |
| 5-7/week             | 965 | 0.76                 | 0.64                   | 0.68                      | 0.53          |
| 2-3/day              | 569 | 0.74                 | 0.62                   | 0.65                      | 0.49          |
| ≥4/day               | 136 | 0.63                 | 0.48                   | 0.52                      | 0.34          |
| Regular coffee       |     |                      |                        |                           |               |
| <1/month             | 698 | Ref.                 | Ref.                   | Ref.                      | Ref.          |
| 1/month-4/week       | 299 | 0.72                 | 0.59                   | 0.63                      | 0.47          |
| 5-7/week             | 844 | 0.79                 | 0.68                   | 0.71                      | 0.57          |
| 2-3/day              | 473 | 0.75                 | 0.64                   | 0.68                      | 0.52          |
| ≥4/day               | 87  | 0.58                 | 0.43                   | 0.47                      | 0.29          |
| Tea                  |     |                      |                        |                           |               |
| <1/month             | 883 | Ref.                 | Ref.                   | Ref.                      | Ref.          |
| 1/month-4/week       | 829 | 0.80                 | 0.70                   | 0.73                      | 0.59          |
| 5-7/week             | 499 | 0.77                 | 0.66                   | 0.69                      | 0.54          |
| ≥2/day               | 192 | 0.69                 | 0.55                   | 0.59                      | 0.42          |

<sup>1</sup> Values are the minimum effect size (hazard ratio for per cup/day increase) for 80% power
